# Supplementary material for: Error in prostate-specific antigen levels after prostate cancer treatment with radical prostatectomy
Source: publisher site journal article supplement (doi:10.1515/cclm-2025-0430), 2025-05-28
Supplement: Supplementary file 1 [file j_cclm-2025-0430_suppl_001.docx]

**Supplemental Methods:**

The average values and dispersion of the results obtained in the external quality assessment (EQA) round were estimated using robust statistics. Robust statistics are less sensitive to outliers and incorrectly specified distributional assumptions. As defined in the current manual of the Dutch Foundation for Quality Assessment in Medical Laboratory Diagnostics (SKML) (1):

- The center of a set of results (mean) is approximated by taking the median.
- The dispersion within a set of results (standard deviation (SD)) is approximated as follows:
  - if n = 2, then | result 1 – result 2 | / square root (2);
  - if n > 2, then the scaled median absolute deviation (MADe);
  - if MADe = 0, then the normalized interquartile range (nIQR);
  - if nIQR = 0, then the arithmetic SD.

Outliers were defined as results that deviated > 3SD from the method’s mean. Mean and SD were reapproximated once after outlier removal (1).

The All Labs Trimmed Mean (ALTM) was defined as the average and SD calculated for all results, regardless of the method used, after removal of outliers (1).

The consensus value was defined as the non-weighted mean of the included individual method mean values (2). This reduces the impact of methods that are disproportionally represented in the EQA round as compared with the ALTM.

**Supplemental Table:**

Supplemental Table 1. Inter-method comparison of PSA results at the low end of the measurement range based on a single external quality assessment sample

| **Method** | ***Na*** | **LoDb**  **(μg/L)** | **Mean (SD)c**  **(μg/L)** | **CV**  **(%)** | **Range (μg/L)** | **Bias (SEM)d**  **(%)** |
| --- | --- | --- | --- | --- | --- | --- |
| Abbott Architect/Alinity | 8 | 0.008/  0.003 | 0.060 (0.007) | 11.7 | 0.050-0.070 | -34.6 (2.9) |
| Beckman Coulter Access/DXI | 9 | 0.008 | 0.100 (0.007) | 7.0 | 0.090-0.120 | 18.9 (3.9) |
| Roche Cobas | 75 | 0.010 | 0.080 (0.008) | 10.0 | 0.050-0.100 | -9.9 (1.1) |
| Siemens Advia/Centaur | 7 | 0.01 | 0.140 (0.044) | 31.4 | 0.100-0.170 | 49.6 (12.0) |
| Siemens Atellica | 8 | 0.02 | 0.095 (0.007) | 7.4 | 0.080-0.100 | 6.7 (3.0) |
| Siemens Dimension Vista | 2 | 0.010 | 0.070 (N/A) | N/A | 0.070-0.070 | -20.3 (N/A) |
| Siemens Immulite 2x00/xpi | 1 | 0.04 | 0.070 (N/A) | N/A | N/A | -20.3  (N/A) |
| All labs trimmed | 110 | N/A | 0.080 (0.015) | 18.8 | 0.050-0.170 | N/A |

a Number of individual results.

b Extracted from publicly available package inserts. For the Abbott Architect, Siemens Advia/Centaur and Siemens Immulite 2x00/xpi only the analytical sensitivity was provided, which was defined as the concentration of total PSA that corresponds to the relative light units (RLUs) that are two standard deviations greater than the mean RLUs of replicate determinations of the PSA zero standard. For the other methods, the limit of detection corresponds to the lowest analyte concentration which can be detected (value above the limit of blank) with a probability of 95 %.

c Average values and dispersion were estimated using robust statistics as described in the Supplemental Methods.

d Bias vs. consensus, with consensus calculated as the non-weighted average of mean PSA per method (0.088 μg/L).

Abbreviations: CV, coefficient of variation; LoD, limit of detection; N/A, not applicable; SD, standard deviation; SEM, standard error of the mean.

**Supplemental Figure:**


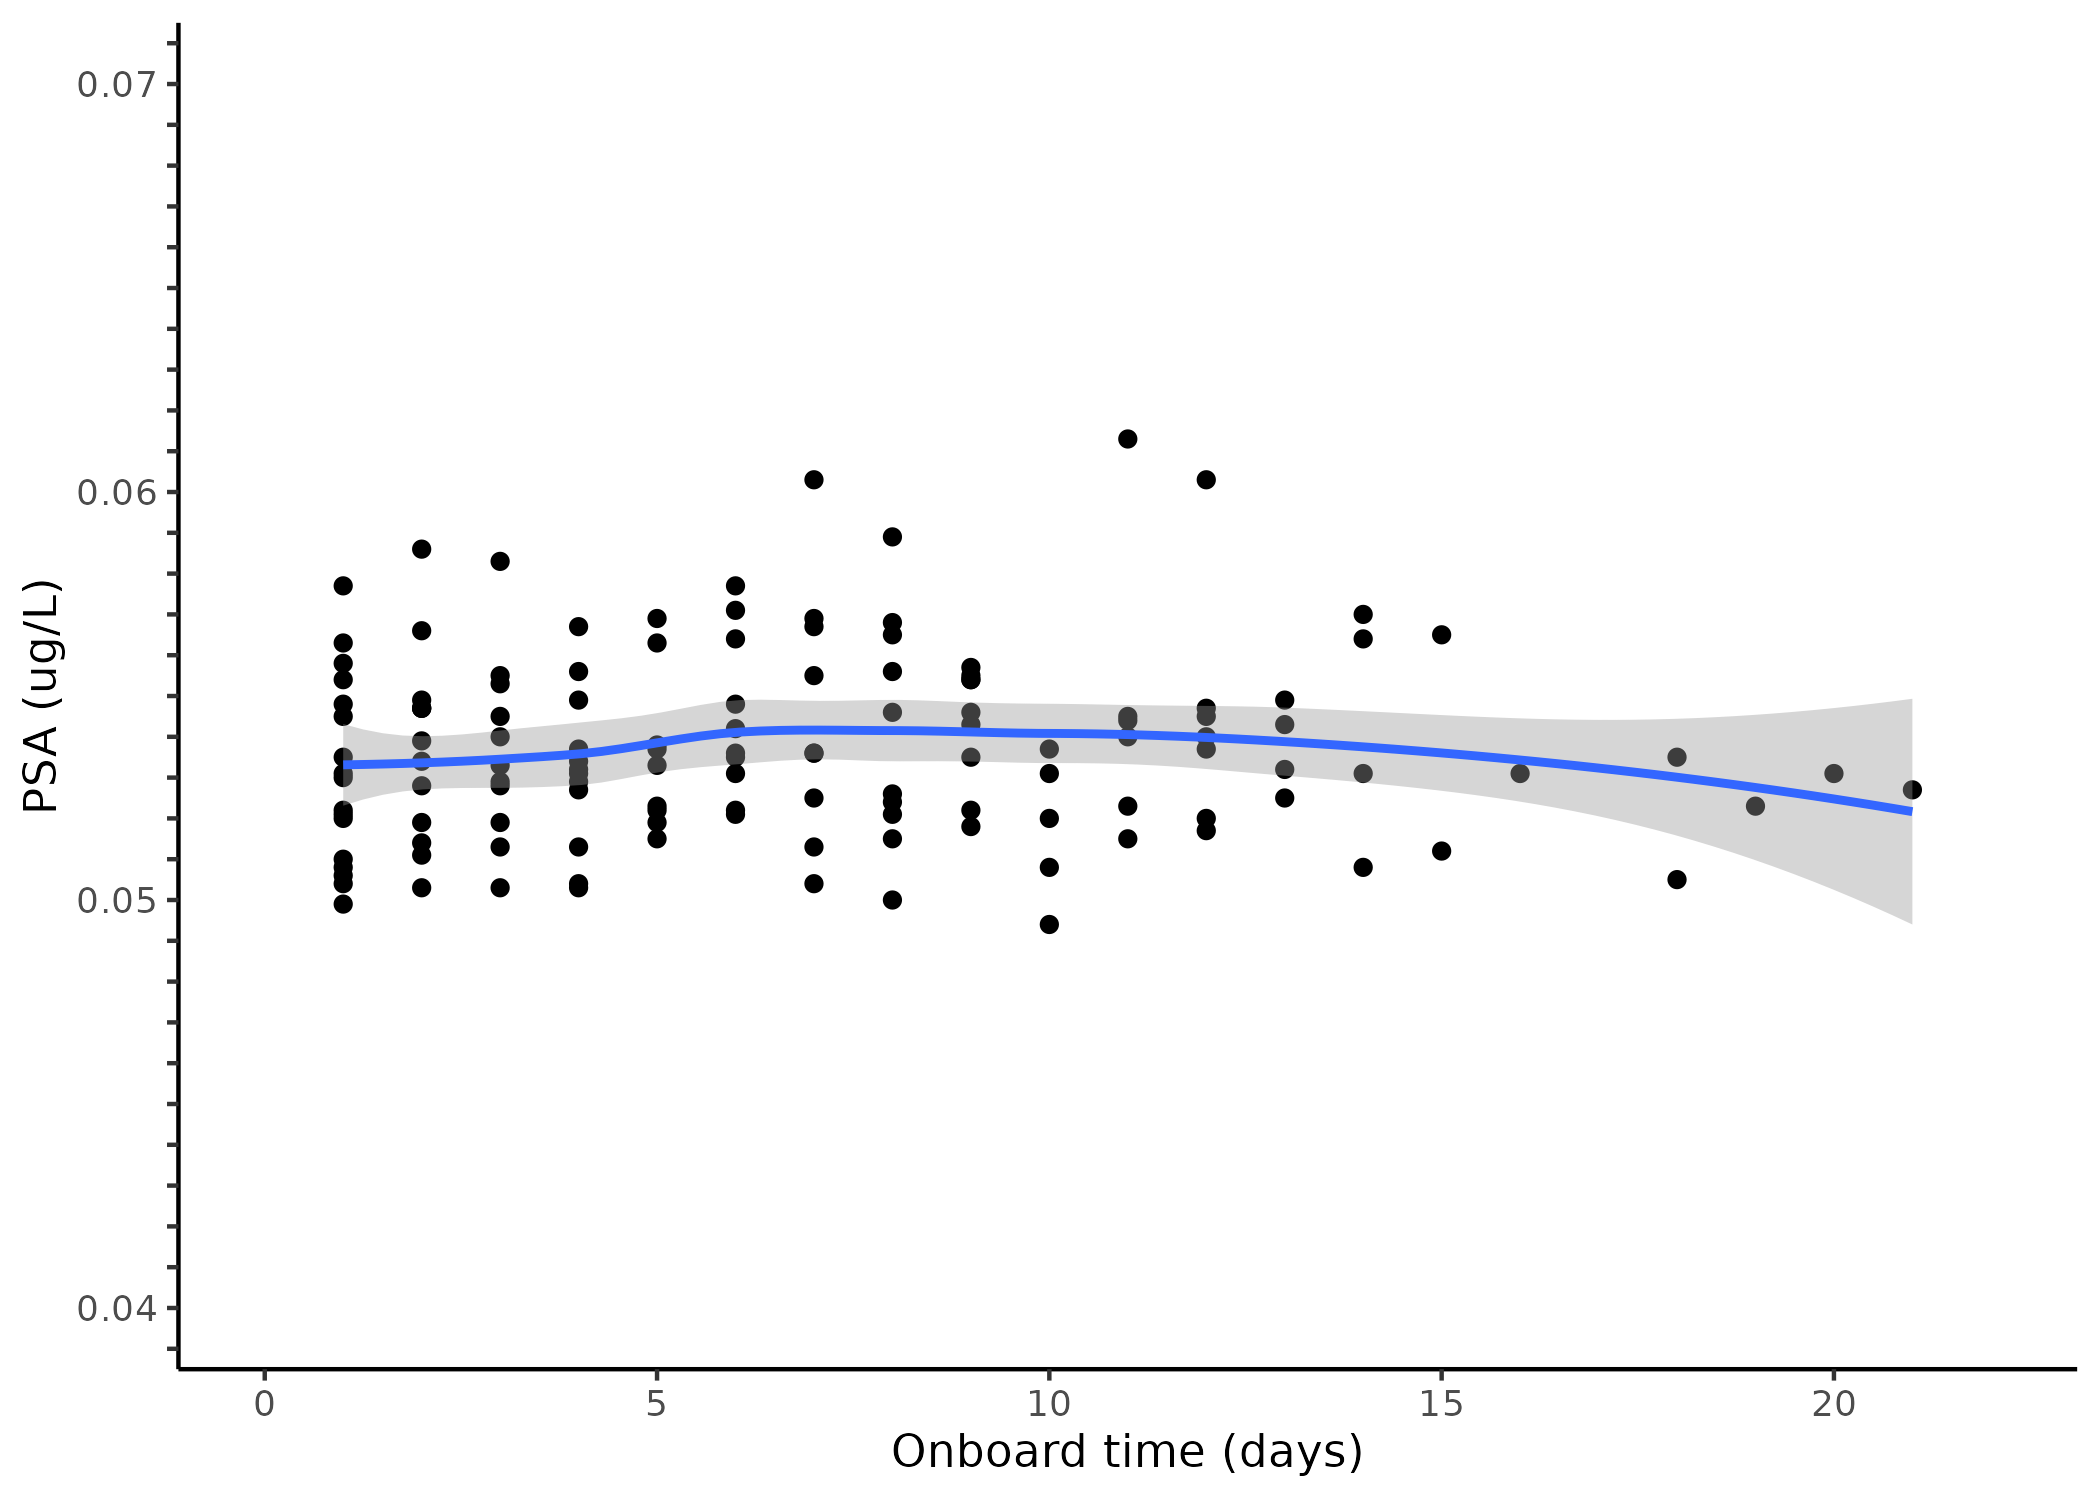
Supplemental Figure 1. Exploratory analysis on the association of reagent bottle onboard time and PSA level based on real-world data. Median [25th-75th percentiles] on board time was 9 [5-13] days. LOESS regression (blue line with 95% confidence interval; constructed with ggplot in R version 4.4.2) showed no material change in average PSA value with increasing onboard time. However, the uneven distribution of the number of measurements across the range of days limits the precision of the results at an onboard time > 7 days.

**References**

1. Thelen MHM, Jansen RTP, Weykamp CW, Steigstra H, Meijer R, Cobbaert CM. Expressing analytical performance from multi-sample evaluation in laboratory EQA. Clin Chem Lab Med. 2017;55(10):1509-16. Version 2.8 available from: https://www.skml.nl/app/uploads/2024/09/MUSE-manual-version-2.8.pdf [accessed 8-11-2024]. Section on robust statistics at page 4.

2. Van Rossum HH, Holdenrieder S, Ballieux BEPB, Badrick TC, Yun YM, Zhang C, e.a. Investigating the current harmonization status of tumor markers using global external quality assessment programs: a feasibility study. Clin Chem. 2024;70(4):669-79.
